# Supplementary material for: Using Single Colors and Color Pairs to Communicate Basic Tastes II: Foreground–Background Color Combinations
Source: PubMed Central journal article supplement (PMC5034334; doi:10.1177/2041669516663750), 2016-09-20
Supplement: Supplementary_Table.pdf [file Supplementary_Table.pdf]

**Supplementary Table:** Showing the results of the posthoc tests from Experiment 2, conducted with the rmmcp function as part of the ‘WRS’ r package. The test compares the mean among dependent variables and ascertains whether they differ more so than expected by chance. The test controls for multiple comparisons (hence the ‘critical  $p$ ’ column in the table).

| Taste  | Patch 1     | Patch 2     | T     | $p$     | Critical $p$ | SE   | Sig diff |
|--------|-------------|-------------|-------|---------|--------------|------|----------|
| bitter | blackBlack  | blackRed    | 1.38  | 0.17193 | 0.0127       | 4.21 |          |
|        | blackBlack  | blackWhite  | 2.6   | 0.01166 | 0.00568      | 3.41 |          |
|        | blackBlack  | blackYellow | -0.35 | 0.72541 | 0.05         | 5.21 |          |
|        | blackBlack  | blackBlue   | 2.46  | 0.01689 | 0.00639      | 3.53 |          |
|        | blackRed    | blackWhite  | 1.52  | 0.13499 | 0.00851      | 3.89 |          |
|        | blackRed    | blackYellow | -1.68 | 0.09908 | 0.0073       | 3.53 |          |
|        | blackRed    | blackBlue   | 0.39  | 0.69715 | 0.025        | 2.95 |          |
|        | blackWhite  | blackYellow | -3.52 | 0.00085 | 0.00511      | 3.58 | *        |
|        | blackWhite  | blackBlue   | -0.73 | 0.4702  | 0.0169       | 3.79 |          |
|        | blackYellow | blackBlue   | 1.47  | 0.14741 | 0.0102       | 4.5  |          |
| salty  | whiteBlue   | whiteWhite  | -1.45 | 0.15146 | 0.0127       | 4.07 |          |
|        | whiteBlue   | blueWhite   | 2.59  | 0.01217 | 0.00851      | 3.18 |          |
|        | whiteBlue   | whiteRed    | 4.11  | 0.00013 | 0.00511      | 3.17 | *        |
|        | whiteBlue   | whiteBlack  | 2.68  | 0.00952 | 0.0073       | 4.09 |          |
|        | whiteWhite  | blueWhite   | 2.3   | 0.02506 | 0.0102       | 6.16 |          |
|        | whiteWhite  | whiteRed    | 3.77  | 0.00038 | 0.00568      | 4.52 | *        |
|        | whiteWhite  | whiteBlack  | 3.41  | 0.00119 | 0.00639      | 3.95 | *        |
|        | blueWhite   | whiteRed    | 0.14  | 0.89111 | 0.05         | 4.95 |          |
|        | blueWhite   | whiteBlack  | 0.24  | 0.80814 | 0.025        | 5.62 |          |
|        | whiteRed    | whiteBlack  | -0.41 | 0.68646 | 0.0169       | 3.74 |          |
| sour   | greenRed    | greenGreen  | -2.35 | 0.02211 | 0.025        | 4.27 | *        |
|        | greenRed    | greenYellow | -5.98 | 0       | 0.0073       | 3.43 | *        |
|        | greenRed    | greenPurple | 2.14  | 0.03652 | 0.05         | 3.49 | *        |
|        | greenRed    | greenBlack  | 3.69  | 0.00049 | 0.0127       | 3.85 | *        |
|        | greenGreen  | greenYellow | -3.66 | 0.00055 | 0.0169       | 2.75 | *        |
|        | greenGreen  | greenPurple | 4.95  | 0.00001 | 0.00851      | 3.79 | *        |
|        | greenGreen  | greenBlack  | 6.31  | 0       | 0.00639      | 4.06 | *        |
|        | greenYellow | greenPurple | 7.12  | 0       | 0.00568      | 3.82 | *        |
|        | greenYellow | greenBlack  | 10.38 | 0       | 0.00511      | 3.71 | *        |
|        | greenPurple | greenBlack  | 3.8   | 0.00034 | 0.0102       | 2.87 | *        |
| sweet  | pinkPurple  | pinkPink    | -5.75 | 0       | 0.00511      | 3.67 | *        |
|        | pinkPurple  | pinkRed     | -0.85 | 0.39956 | 0.025        | 2.76 |          |
|        | pinkPurple  | pinkWhite   | -4.41 | 0.00004 | 0.00568      | 4.32 | *        |
|        | pinkPurple  | whitePink   | -2.6  | 0.01179 | 0.00851      | 4.76 |          |
|        | pinkPink    | pinkRed     | 3.54  | 0.00078 | 0.00639      | 5.18 | *        |
|        | pinkPink    | pinkWhite   | 0.7   | 0.48425 | 0.05         | 2.99 |          |
|        | pinkPink    | whitePink   | 2     | 0.05039 | 0.0102       | 4.03 |          |
|        | pinkRed     | pinkWhite   | -3.38 | 0.00128 | 0.0073       | 4.69 | *        |
|        | pinkRed     | whitePink   | -1.65 | 0.10504 | 0.0169       | 5.85 |          |
|        | pinkWhite   | whitePink   | 1.79  | 0.07873 | 0.0127       | 2.86 |          |
